# Supplementary material
Source: HighWire-hosted journal article supplement (https://bmjopen.bmj.com/content/12/8/e059564)
Supplement: inline-supplementary-material-3 [file inline-supplementary-material-3.pdf]

**Supplementary file 3: Dental Practice Organisation Measure (DPOM) Instrument Responses by Compliance**

| Dimension (Cronbach's alpha)                          | Emergency Dental Care |         |         | Oral Health Assessment & Review |         |         | Drug Prescribing |         |         |
|-------------------------------------------------------|-----------------------|---------|---------|---------------------------------|---------|---------|------------------|---------|---------|
|                                                       | Mean (SD)             | t-value | p-value | Mean (SD)                       | t-value | p-value | Mean (SD)        | t-value | p-value |
| <b>Autonomy (<math>\alpha = 0.7</math>)</b>           |                       |         |         |                                 |         |         |                  |         |         |
| Compliant                                             | 2.67 (0.60)           | -1.18   | 0.24    | 2.63 (0.50)                     | -1.33   | 0.18    | 2.77 (0.43)      | 0.38    | 0.70    |
| Non-Compliant                                         | 2.74 (0.52)           |         |         | 2.74 (0.56)                     |         |         | 2.70 (0.56)      |         |         |
| <b>Integration (<math>\alpha = 0.8</math>)</b>        |                       |         |         |                                 |         |         |                  |         |         |
| Compliant                                             | 3.56 (0.46)           | 4.70    | <0.01** | 3.50 (0.51)                     | 1.75    | 0.08    | 3.33 (0.45)      | -0.32   | 0.75    |
| Non-Compliant                                         | 3.28 (0.59)           |         |         | 3.37 (0.56)                     |         |         | 3.39 (0.56)      |         |         |
| <b>Involvement (<math>\alpha = 0.9</math>)</b>        |                       |         |         |                                 |         |         |                  |         |         |
| Compliant                                             | 3.33 (0.60)           | 3.08    | <0.01** | 3.11 (0.67)                     | 0.38    | 0.70    | 3.23 (0.69)      | 0.85    | 0.40    |
| Non-Compliant                                         | 3.00 (0.68)           |         |         | 3.07 (0.64)                     |         |         | 3.07 (0.66)      |         |         |
| <b>Training (<math>\alpha = 0.8</math>)</b>           |                       |         |         |                                 |         |         |                  |         |         |
| Compliant                                             | 3.29 (0.65)           | 3.43    | <0.01** | 3.32 (0.60)                     | 2.53    | 0.01**  | 3.35 (0.29)      | 1.16    | 0.25    |
| Non-Compliant                                         | 3.05 (0.63)           |         |         | 3.09 (0.66)                     |         |         | 3.13 (0.66)      |         |         |
| <b>Supervisor Support (<math>\alpha = 0.9</math>)</b> |                       |         |         |                                 |         |         |                  |         |         |
| Compliant                                             | 3.44 (0.56)           | 4.03    | <0.01** | 3.34 (0.60)                     | 0.75    | 0.46    | 3.25 (0.54)      | 0.20    | 0.85    |
| Non-Compliant                                         | 3.19 (0.53)           |         |         | 3.28 (0.56)                     |         |         | 3.28 (0.57)      |         |         |
| <b>Welfare (<math>\alpha = 0.9</math>)</b>            |                       |         |         |                                 |         |         |                  |         |         |
| Compliant                                             | 3.55 (0.62)           | 3.06    | <0.01** | 3.40 (0.63)                     | -0.24   | 0.81    | 3.75 (0.45)      | 1.76    | 0.08    |
| Non-Compliant                                         | 3.32 (0.71)           |         |         | 3.42 (0.70)                     |         |         | 3.39 (0.57)      |         |         |
| <b>Efficiency (<math>\alpha = 0.9</math>)</b>         |                       |         |         |                                 |         |         |                  |         |         |
| Compliant                                             | 2.84 (0.77)           | 3.31    | <0.01** | 2.72 (0.76)                     | 0.58    | 0.56    | 2.52 (0.68)      | -0.65   | 0.52    |
| Non-Compliant                                         | 2.56 (0.77)           |         |         | 2.66 (0.78)                     |         |         | 2.67 (0.79)      |         |         |
| <b>Tradition (<math>\alpha = 0.8</math>)</b>          |                       |         |         |                                 |         |         |                  |         |         |
| Compliant                                             | 2.18 (0.58)           | -1.65   | 0.10    | 2.09 (0.62)                     | -2.47   | 0.01**  | 2.33 (0.54)      | 0.43    | 0.67    |
| Non-Compliant                                         | 2.29 (0.62)           |         |         | 2.30 (0.60)                     |         |         | 2.26 (0.62)      |         |         |

|                                                                 | Emergency Dental Care |         |         | Oral Health Assessment & Review |         |         | Drug Prescribing |         |         |
|-----------------------------------------------------------------|-----------------------|---------|---------|---------------------------------|---------|---------|------------------|---------|---------|
|                                                                 | Mean (SD)             | t-value | p-value | Mean (SD)                       | t-value | p-value | Mean (SD)        | t-value | p-value |
| <b>Quality (<math>\alpha = 0.8</math>)</b>                      |                       |         |         |                                 |         |         |                  |         |         |
| Compliant                                                       | 3.78 (0.39)           | 2.71    | <0.01** | 3.82 (0.30)                     | 2.38    | 0.02*   | 3.85 (0.32)      | 1.26    | 0.21    |
| Non-Compliant                                                   | 3.66 (0.44)           |         |         | 3.68 (0.45)                     |         |         | 3.69 (0.44)      |         |         |
| <b>Formalisation (<math>\alpha = 0.8</math>)</b>                |                       |         |         |                                 |         |         |                  |         |         |
| Compliant                                                       | 3.78 (0.39)           | 3.32    | <0.01** | 3.58 (0.45)                     | 3.08    | <0.01** | 3.47 (0.39)      | 0.45    | 0.66    |
| Non-Compliant                                                   | 3.66 (0.44)           |         |         | 3.36 (0.53)                     |         |         | 3.40 (0.53)      |         |         |
| <b>Innovation &amp; Flexibility (<math>\alpha = 0.9</math>)</b> |                       |         |         |                                 |         |         |                  |         |         |
| Compliant                                                       | 3.20 (0.59)           | 4.55    | <0.01** | 3.20 (0.54)                     | 2.86    | <0.01** | 2.92 (0.43)      | -0.72   | 0.47    |
| Non-Compliant                                                   | 2.93 (0.53)           |         |         | 2.98 (0.57)                     |         |         | 3.04 (0.58)      |         |         |
| <b>Outward Focus (<math>\alpha = 0.8</math>)</b>                |                       |         |         |                                 |         |         |                  |         |         |
| Compliant                                                       | 3.42 (0.44)           | 2.46    | <0.01** | 3.52 (0.36)                     | 3.34    | <0.01** | 3.35 (0.51)      | 0.12    | 0.91    |
| Non-Compliant                                                   | 3.29 (0.51)           |         |         | 3.30 (0.51)                     |         |         | 3.33 (0.50)      |         |         |
| <b>Learning &amp; Reflection (<math>\alpha = 0.8</math>)</b>    |                       |         |         |                                 |         |         |                  |         |         |
| Compliant                                                       | 3.04 (0.62)           | 4.53    | <0.01** | 3.05 (0.56)                     | 2.91    | <0.01** | 2.87 (0.49)      | -0.07   | 0.95    |
| Non-Compliant                                                   | 2.75 (0.53)           |         |         | 2.82 (0.58)                     |         |         | 2.88 (0.60)      |         |         |
| <b>Clarity of Practice Goals (<math>\alpha = 0.9</math>)</b>    |                       |         |         |                                 |         |         |                  |         |         |
| Compliant                                                       | 3.09 (0.72)           | 4.26    | <0.01** | 3.11 (0.76)                     | 2.85    | <0.01** | 2.65 (0.54)      | -1.26   | 0.21    |
| Non-Compliant                                                   | 2.76 (0.69)           |         |         | 2.83 (0.70)                     |         |         | 2.91 (0.72)      |         |         |
| <b>Effort (<math>\alpha = 0.9</math>)</b>                       |                       |         |         |                                 |         |         |                  |         |         |
| Compliant                                                       | 3.42 (0.60)           | 2.97    | <0.01** | 3.52 (0.52)                     | 3.39    | <0.01** | 3.12 (0.43)      | -1.12   | 0.26    |
| Non-Compliant                                                   | 3.23 (0.54)           |         |         | 3.25 (0.57)                     |         |         | 3.31 (0.59)      |         |         |
| <b>Performance Feedback (<math>\alpha = 0.9</math>)</b>         |                       |         |         |                                 |         |         |                  |         |         |
| Compliant                                                       | 2.74 (0.74)           | 3.19    | <0.01** | 2.70 (0.80)                     | 1.49    | 0.14    | 2.48 (0.79)      | -0.50   | 0.62    |
| Non-Compliant                                                   | 2.49 (0.67)           |         |         | 2.55 (0.69)                     |         |         | 2.59 (0.72)      |         |         |

|                                                                | Emergency Dental Care |         |         | Oral Health Assessment & Review |         |         | Drug Prescribing |         |         |
|----------------------------------------------------------------|-----------------------|---------|---------|---------------------------------|---------|---------|------------------|---------|---------|
|                                                                | Mean (SD)             | t-value | p-value | Mean (SD)                       | t-value | p-value | Mean (SD)        | t-value | p-value |
| <b>Pressure to Produce<br/>(<math>\alpha = 0.7</math>)</b>     |                       |         |         |                                 |         |         |                  |         |         |
| Compliant                                                      | 2.23 (0.50)           | -0.75   | 0.46    | 2.20 (0.48)                     | -0.94   | 0.35    | 1.97 (0.39)      | -2.02   | 0.04*   |
| Non-Compliant                                                  | 2.27 (0.53)           |         |         | 2.27 (0.53)                     |         |         | 2.27 (0.52)      |         |         |
| <b>Guidance Dissemination<br/>(<math>\alpha = 0.8</math>)</b>  |                       |         |         |                                 |         |         |                  |         |         |
| Compliant                                                      | 3.24 (0.69)           | 2.83    | <0.01** | 3.27 (0.64)                     | 2.16    | 0.03*   | 3.22 (0.67)      | 0.52    | 0.60    |
| Non-Compliant                                                  | 3.04 (0.59)           |         |         | 3.08 (0.64)                     |         |         | 3.12 (0.65)      |         |         |
| <b>Guidance Prioritisation<br/>(<math>\alpha = 0.6</math>)</b> |                       |         |         |                                 |         |         |                  |         |         |
| Compliant                                                      | 2.41 (0.43)           | 0.64    | 0.52    | 2.37 (0.46)                     | -0.39   | 0.70    | 2.28 (0.62)      | -0.91   | 0.37    |
| Non-Compliant                                                  | 2.38 (0.43)           |         |         | 2.39 (0.43)                     |         |         | 2.40 (0.44)      |         |         |

\*\*Significant at the 0.01 level

\*Significant at the 0.05 level
